# Supplementary material for: Improved benzene production from methane dehydroaromatization over Mo/HZSM-5 catalysts via hydrogen-permselective palladium membrane reactors
Source: Royal Society of Chemistry journal article supplement (doi:10.1039/c5cy00934k), 2015-01-01
Supplement: c5cy00934k1.pdf [file c5cy00934k1.pdf]

*Electronic Supplementary Information*

**Improved Benzene Production from Methane Dehydroaromatization over Mo/HZSM-5 Catalysts via Hydrogen-Permselective Palladium Membrane Reactors**

S. Natesakhawat,<sup>a,b</sup> N. C. Means,<sup>a,c</sup> B. H. Howard,<sup>a</sup> M. Smith,<sup>d,e</sup> V. Abdelsayed,<sup>d,e</sup> J. P. Baltrus,<sup>a</sup> Y. Cheng,<sup>a</sup> J. W. Lekse,<sup>a,c</sup> D. Link<sup>a</sup> and B. D. Morreale<sup>a</sup>

<sup>a</sup>National Energy Technology Laboratory, United States Department of Energy, P.O. Box 10940, Pittsburgh, PA 15236, USA.

<sup>b</sup>Department of Chemical and Petroleum Engineering, University of Pittsburgh, Pittsburgh, PA 15261, USA

<sup>c</sup>AECOM, 626 Cochran Mill Road, Pittsburgh, PA 15236, USA

<sup>d</sup>National Energy Technology Laboratory, United States Department of Energy, Morgantown, WV 26507, USA

<sup>e</sup>AECOM, 3610 Collins Ferry Road, Morgantown, WV 26507, USA

E-mail: Sittichai.Natesakhawat@NETL.DOE.GOV

**Table S1** Experimental matrix of the permeation study

| Effect                      | Gas Mixtures                                                     | $Y_{H_2, \text{feed}}$<br>(mol%) | $Q_{Ar, \text{sweep}}$<br>( $\text{cm}^3 \text{min}^{-1}$ ) | $Q_{\text{feed}}$<br>( $\text{cm}^3 \text{min}^{-1}$ ) | T<br>(°C)       |
|-----------------------------|------------------------------------------------------------------|----------------------------------|-------------------------------------------------------------|--------------------------------------------------------|-----------------|
| Sweep gas flow rate         | H <sub>2</sub> /N <sub>2</sub>                                   | 1/5/10/25                        | 50/350/700                                                  | 50                                                     | 350             |
| Feed gas flow rate          | H <sub>2</sub> /N <sub>2</sub>                                   | 1/5/10/25                        | 350                                                         | 50/500/2000                                            | 350             |
| Membrane temperature        | H <sub>2</sub> /N <sub>2</sub>                                   | 10                               | 350                                                         | 50                                                     | 350/450/550/700 |
| Presence of CH <sub>4</sub> | H <sub>2</sub> /N <sub>2</sub> , H <sub>2</sub> /CH <sub>4</sub> | 10                               | 350                                                         | 50                                                     | 700             |

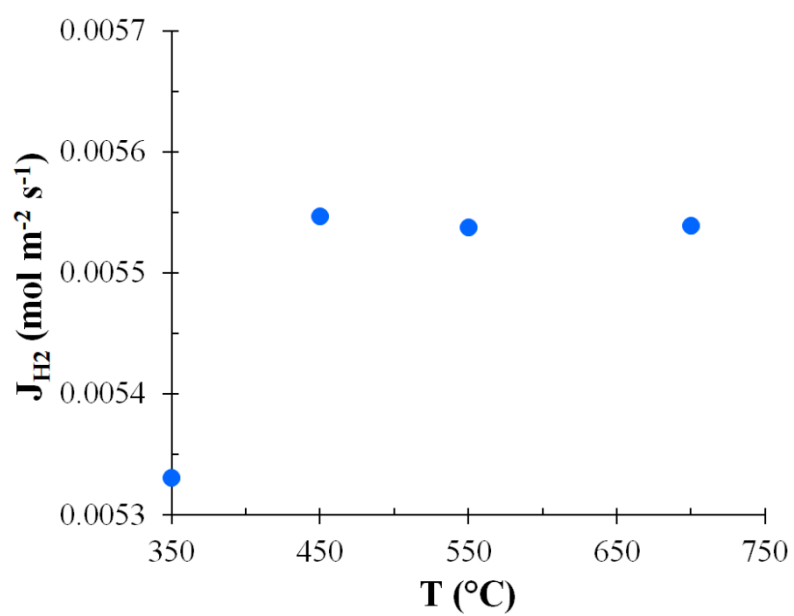

**Fig. 1S** Effect of temperature on H<sub>2</sub> flux for the Pd membrane packed with HZSM-5. Testing conditions are as follows: T = 350, 450, 550, and 700 °C, Feed = 10% H<sub>2</sub>/N<sub>2</sub>, Q<sub>Feed</sub> = 50 cm<sup>3</sup> min<sup>-1</sup>, Q<sub>Ar, sweep</sub> = 350 cm<sup>3</sup> min<sup>-1</sup>.

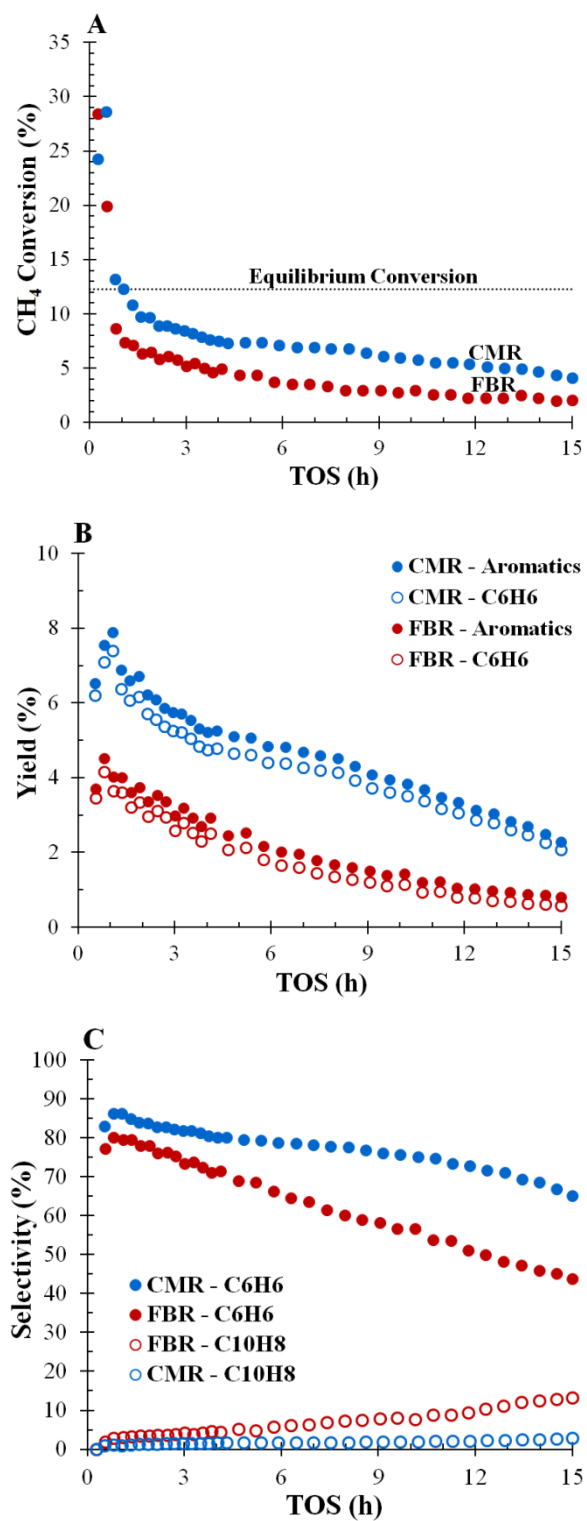

**Fig. 2S** Comparison of the performance of the 4% Mo/HZSM-5 catalyst in FBR and CMR at  $3000 \text{ cm}^3 \text{ g}_{\text{cat}}^{-1} \text{ h}^{-1}$  (A) CH<sub>4</sub> conversion (B) C<sub>6</sub>H<sub>6</sub> and aromatic yields (C) selectivity to C<sub>6</sub>H<sub>6</sub> and C<sub>10</sub>H<sub>8</sub>.

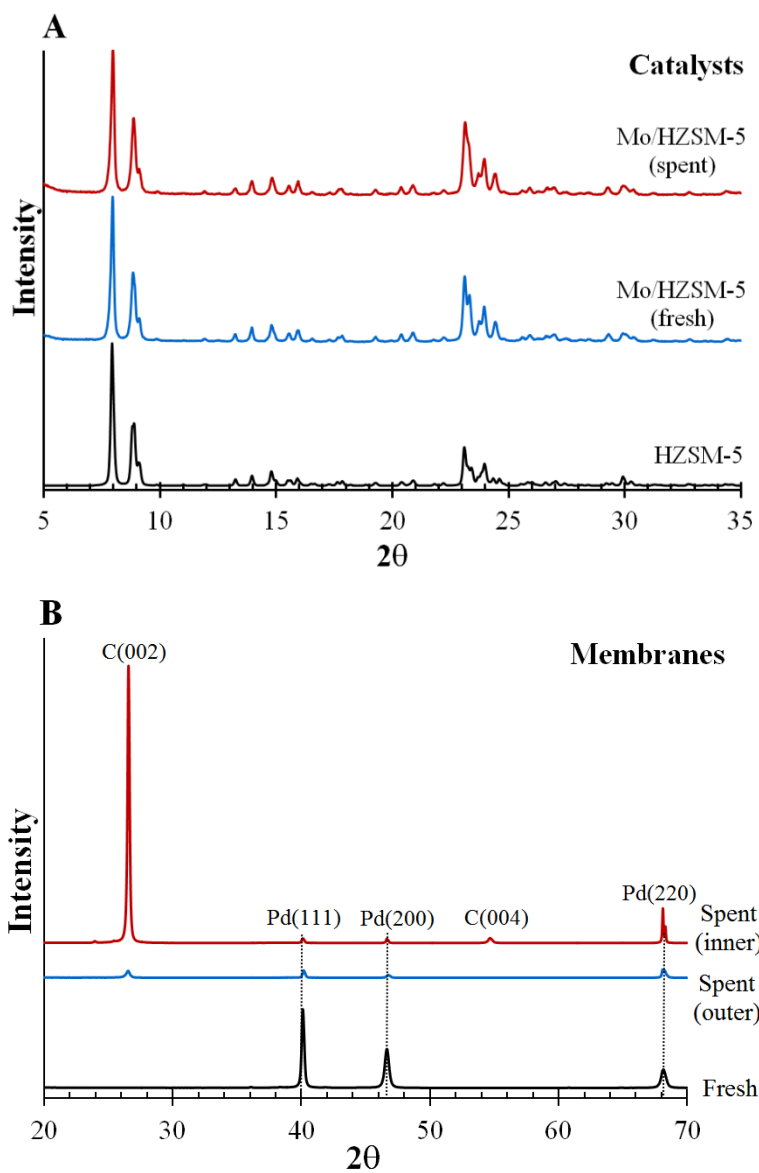

**Fig. 3S** XRD patterns of fresh and spent materials: (A) Mo/HZSM-5 (B) Pd membranes. The XRD pattern of HZSM-5 is included for comparison.

### Mears criterion calculations\*

External mass transfer limitations can be neglected if the Mears criterion listed below is satisfied.

$$\frac{-r_{A(Obs)} \times \rho_b \times R \times n}{k_c \times C_{Ab}} < 0.15$$

Where  $-r_{A(Obs)}$  is the observed reaction rate ( $\text{kmol kg}_{\text{cat}}^{-1} \text{s}^{-1}$ ),  $\rho_b$  is the catalyst bed density ( $\text{kg m}^{-3}$ ),  $R$  is the catalyst pellet radius (m),  $n$  is the reaction order of reactant A,  $k_c$  is the mass transfer coefficient of reactant A, and  $C_{Ab}$  is the concentration of reactant A in the bulk gas phase ( $\text{kmol m}^{-3}$ ).

In this study,  $\rho_b = 1099.2 \text{ kg m}^{-3}$  and  $R = 1.5 \times 10^{-4} \text{ m}$  for 4 wt% Mo/HZSM-5 catalyst. For  $\text{CH}_4$  dehydroaromatization,  $n = 6$ .

For flow over a sphere with very low Reynolds number, Sherwood number ( $Sh$ ) = 2:

$$Sh = \frac{k_c \times 2R}{D_e}$$

Where  $D_e$  is the estimated diffusivity of  $\text{CH}_4$  in the bulk gas phase. At  $700 \text{ }^\circ\text{C}$ ,  $D_e = 4.33 \times 10^{-5} \text{ m}^2 \text{ s}^{-1}$ .

$$k_c = \frac{2 \times 4.33 \times 10^{-5}}{2 \times 1.5 \times 10^{-4}} = 0.289 \text{ m s}^{-1}.$$

At  $T = 700 \text{ }^\circ\text{C}$ ,  $\text{WHSV} = 750 \text{ cm}^3 \text{ g}_{\text{cat}}^{-1} \text{ h}^{-1}$ ,  $\text{TOS} = 15 \text{ h}$ ,  $-r_{A(Obs)} = 1.014 \times 10^{-7} \text{ kmol kg}_{\text{cat}}^{-1} \text{ s}^{-1}$ ,  $C_{Ab} = 8.878 \times 10^{-3} \text{ kmol m}^{-3}$ .

$$\frac{1.014 \times 10^{-7} \times 1099.2 \times 1.5 \times 10^{-4} \times 6}{0.289 \times 8.878 \times 10^{-3}} = 3.910 \times 10^{-5} \ll 0.15$$

At  $T = 700 \text{ }^\circ\text{C}$ ,  $\text{WHSV} = 9000 \text{ cm}^3 \text{ g}_{\text{cat}}^{-1} \text{ h}^{-1}$ ,  $\text{TOS} = 15 \text{ h}$ ,  $-r_{A(Obs)} = 2.017 \times 10^{-7} \text{ kmol kg}_{\text{cat}}^{-1} \text{ s}^{-1}$ ,  $C_{Ab} = 1.081 \times 10^{-2} \text{ kmol m}^{-3}$ .

$$\frac{2.017 \times 10^{-7} \times 1099.2 \times 1.5 \times 10^{-4} \times 6}{0.289 \times 1.081 \times 10^{-2}} = 6.387 \times 10^{-5} \ll 0.15$$

Therefore, the Mears criterion calculations confirm the absence of external mass transfer limitations.

### \*Reference

W.S. Lee, Z. Wang, W. Zheng, D.G. Vlachos, A. Bhan, *Catal. Sci. Technol.*, 2014, **4**, 2340-2352.
